# Supplementary material for: Applying HPLC to Screening QTLs for BLB Resistance in Rice
Source: MDPI journal article supplement (doi:10.3390/plants10102145), 2021-10-09
Supplement: s1 [file s1]

## Supplementary Materials

**Table S1.** The plant traits and peak no. of 120 CNDH (Cheongcheong/Nagdong double haploid) populations by HPLC (high-performance liquid chromatography).

| Peak | Parents         |                 | CNDH population |                   |
|------|-----------------|-----------------|-----------------|-------------------|
| No.  | Cheongcheong    | Nagdong         | Range           | Means             |
| 1    | 376076±124025.0 | 498711±191811.9 | 189497-908957   | 376757.0±123776.6 |
| 2    | 503204±165950.3 | 732059±281561.2 | 234813-1595482  | 582843.5±229799.0 |
| 3    | 30903±10191.4   | 18719±7199.6    | 9503-44841      | 23225.7±8190.3    |
| 4    | 33016±10888.3   | 10607±4079.6    | 9784-52081      | 25692.4±10987.3   |
| 5    | 15481±5105.4    | 9939±3822.7     | 9555-56023      | 17203.4±8180.9    |
| 6    | 20033±6606.6    | 28011±10773.5   | 9353-248110     | 24564.6±32173.4   |
| 7    | 11609±3828.5    | 63311±24350.4   | 9499-274272     | 34506.3±47551.8   |
| 8    | 76965±25382.1   | 11078±4260.8    | 9473-138383     | 28642.1±26765.5   |
| 9    | 20081±6622.5    | 10721±4123.5    | 9351-141933     | 29120.0±28806.4   |
| 10   | 22800±7519.1    | 21902±8423.8    | 9385-188335     | 30105.8±36158.5   |
| 11   | 13378±4411.9    | 14008±5387.7    | 9376-465403     | 60889.8±102383.6  |
| 12   | 15340±5058.9    | 19239±7399.6    | 9690-454416     | 63333.5±104020.3  |
| 13   | 16510±2283.3    | 9830±3780.8     | 9355-411198     | 80153.7±100643.3  |
| 14   | 23246±3214.9    | 378130±145434.6 | 9358-405675     | 103765.7±122781.9 |
| 15   | 56108±18503.7   | 20688±7956.9    | 9679-597418     | 94899.8±114629.7  |
| 16   | 66179±21825.0   | 19052±7327.7    | 9621-594881     | 96157.5±108256.7  |
| 17   | 122364±40354.1  | 280222±107777.7 | 9409-372965     | 87963.7±92997.7   |

**Table S2.** Details of QTL mapping using HPLC analysis results of 120 CNDH population after *Xanthomonas oryzae* pv. *oryzae* inoculation.

| Peak No. | QTLs       | Interval Markers <sup>z</sup> | Chromosome | LOD   | Additive effect <sup>y</sup> | $R^{2x}$ | Increasing effects <sup>w</sup> |
|----------|------------|-------------------------------|------------|-------|------------------------------|----------|---------------------------------|
| 4        | qh4BLB-3   | RM7197-RM15063                | 3          | 3.38  | 4.03                         | 1.62     | Cheongcheong                    |
|          | qh4BLB-6   | RM345-RM439                   | 6          | 4.14  | 12.09                        | 4.12     | Nagdong                         |
|          | qh4BLB-7   | RM21582-RM248                 | 7          | 4.83  | 3.93                         | 1.13     | Cheongcheong                    |
| 9        | qh9BLB-2   | RM1106-RM12856                | 2          | 3.41  | 3.97                         | 1.53     | Nagdong                         |
| 12       | qh12BLB-8  | RM22197-RM23314               | 8          | 4.12  | 3.68                         | 1.42     | Nagdong                         |
| 13       | qh13BLB-7  | RM21107-RM418                 | 7          | 3.74  | 12.73                        | 4.34     | Nagdong                         |
| 14       | qh14BLB-7  | RM21105-RM21582               | 7          | 10.89 | 20.22                        | 7.46     | Nagdong                         |
|          | qh14BLB-10 | RM25219-RM25036               | 10         | 3.03  | 11.89                        | 3.71     | Nagdong                         |
| 16       | qh16BLB-7  | RM21582-RM248                 | 7          | 3.76  | 2.51                         | 0.62     | Nagdong                         |

<sup>z</sup> Interval markers are those within the significance threshold on each border of the QTL range

<sup>y</sup> The proportion of evaluated phenotypic change attributable to a particular QTL was estimated using the coefficient of determination ( $R^2$ )

<sup>x</sup> Positive values of the additive effect indicate that alleles from Cheongcheong are in the direction of increasing the traits

<sup>w</sup> Increase allele is the source of the allele that causes an increase in the measured trait.

**Table S3.** Candidate genes involved in Bacterial leaf blight resistance.

| Item              | Gene                                                      | No. of genes |
|-------------------|-----------------------------------------------------------|--------------|
| WRKY family       | Similar to WRKY transcription factor 39.                  | 9            |
|                   | WRKY transcription factor 39.                             |              |
|                   | WRKY transcription factor 78.                             |              |
|                   | Similar to SUSIBA2-like (WRKY transcription factor 80).   |              |
|                   | DNA-binding WRKY domain containing protein.               |              |
|                   | Similar to WRKY transcription factor 53                   |              |
|                   | WRKY transcription factor 69.                             |              |
|                   | Similar to WRKY transcription factor 55.                  |              |
|                   | Similar to WRKY1 (WRKY transcription factor 17).          |              |
| Plant defense     | Similar to Multidrug resistance associated protein 2.     | 6            |
|                   | Plant disease resistance response protein family protein. |              |
|                   | Similar to Resistance protein candidate (Fragment).       |              |
|                   | Disease resistance protein family protein.                |              |
|                   | Similar to UVB-resistance protein-like.                   |              |
|                   | Similar to Resistance protein candidate (Fragment).       |              |
| Hormone signaling | Senescence-associated family protein.                     | 3            |
|                   | mRNA splicing factor SYF2 family protein.                 |              |
|                   | Auxin responsive SAUR protein family protein.             |              |

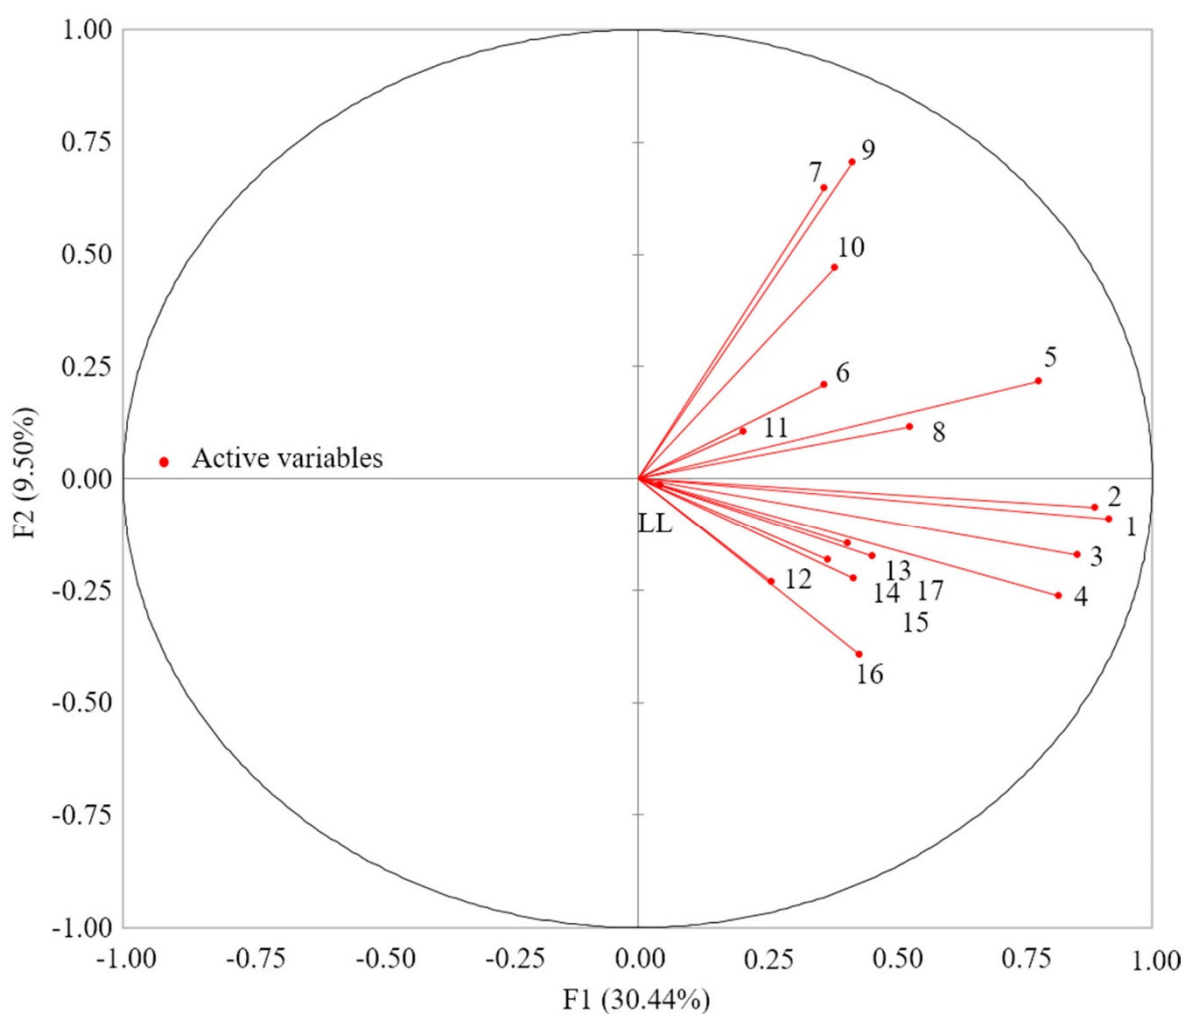

**Figure S1.** PCA (Principal Component Analysis) statistical analysis between the peak area in the HPLC analysis results and the infection length data of the corresponding leaf samples. It shows a projection of the initial variables in the factors space. When two variables are far from the center, then, if they are: Close to each other, they are significantly positively correlated ( $r$  close to 1); If they are orthogonal, they are not correlated ( $r$  close to 0). Number means peak number. LL, Lesion length.
